# Supplementary material for: Synergistic dual sites of Zn–Mg on hierarchical porous carbon as an advanced oxygen reduction electrocatalyst for Zn–air batteries
Source: Royal Society of Chemistry journal article supplement (doi:10.1039/d4dt00152d), 2024-01-01
Supplement: d4dt00152d1.pdf [file d4dt00152d1.pdf]

## Supporting information

# Synergistic dual sites of Zn-Mg on hierarchical porous carbon as an advanced oxygen reduction electrocatalyst for Zn-air batteries

Mincong Liu,<sup>a</sup> Jing Zhang,<sup>b</sup> Yan Peng<sup>a</sup> and Shiyu Guan<sup>\*a</sup>

---

a. Department of Chemistry, College of Science, Shanghai University, 99 Shang-Da Road, Shanghai 200444, China; Email: [syguan@shu.edu.cn](mailto:syguan@shu.edu.cn)

b. College of Sciences&Institute for Sustainable Energy, Shanghai University, 99 Shang-Da Road, Shanghai 200444, China.

---

### 1. Materials characterizations

The morphologies and structures were conducted with scanning electron microscopy (SEM, ZEISS Gemini 300), transmission electron microscopy (TEM, JEOL-2100F) and high-angle annular dark-field scanning transmission electron microscopy (HAADF-STEM) with energy dispersive spectrometry (EDS) (Tecnai G2 F20 electron microscope). X-ray diffraction (XRD) was analyzed by using a Bruker D8 advanced X-ray diffractometer with Cu K $\alpha$  (40 kV, 40 mA). Raman spectrum was obtained on the Horiba Evolution laser Raman spectrometer (under excitation at 532 nm). X-ray photoelectron spectroscopy (XPS) was measured by using Thermo Scientific K-Alpha spectrometer. Brunauer–Emmett–Teller (BET) specific surface areas was collected nitrogen adsorption–desorption analyses by using an ASAP 2460 instrument at 77 K.

### 2. Electrochemical measurements

ORR catalytic activity was performed on a CHI760E electrochemical workstation analyzer (Cheng Hua Instruments, Inc., Shanghai, China) with a standard three-electrode system. The reference electrode and the counter electrode are Ag/AgCl electrode and graphite rod, respectively. The catalyst coated glassy carbon (GC, 5.0 mm diameter) electrodes served as the working electrodes. To prepare a homogeneous catalytic ink, 5 mg of the catalyst was mixed with Nafion solution (40  $\mu$ L), DI water (480  $\mu$ L) and ethanol (480  $\mu$ L) using dispersed ultrasonically for 60 min. Then, 10  $\mu$ L catalytic ink was cast onto the glassy carbon disk electrode and dried at room temperature. Cyclic voltammetry (CV) curves were recorded with a sweep rate of 50 mV s<sup>-1</sup> in N<sub>2</sub>/O<sub>2</sub>-saturated 0.1 M KOH. A series of Linear sweep voltammetry (LSV) tests were performed at rotating speed from 400 to 2025 rpm with a scan rate of 10 mV s<sup>-1</sup> in O<sub>2</sub>-saturated 0.1 M KOH.

The electron transfer number (*n*) and kinetic current density (*J<sub>k</sub>*) were calculated based on the Koutechy-Levich (K-L) equation:

$$\frac{1}{J} = \frac{1}{J_L} + \frac{1}{J_K} = \frac{1}{J_K} \frac{1}{B\omega^{1/2}} \quad \#(1)$$

$B = 0.2nFC_0D_0^{2/3}v^{-1/6}$  # (2) where *J* is the measured current density, *J<sub>k</sub>* and *J<sub>L</sub>* are the kinetic and diffusion-limiting current densities,  $\omega$  is the rotating speed of the disk, *F* is the Faraday constant (96485 C·mol<sup>-1</sup>), *C<sub>0</sub>* is the bulk concentration of O<sub>2</sub> (1.2  $\times 10^{-6}$  mol cm<sup>-3</sup>), *D<sub>0</sub>* is the diffusion coefficient of O<sub>2</sub> (1.9  $\times 10^{-5}$  cm<sup>2</sup> s<sup>-1</sup>), and *v* is the kinematic viscosity of the electrolyte (0.01 cm<sup>2</sup> s<sup>-1</sup>).

The hydrogen peroxide yield (%H<sub>2</sub>O<sub>2</sub>) and electron transfer number (*n*) were determined by rotating ring disk electrode (RRDE, Pine) measurements based on the following two equations:

$$H_2O_2(\%) = 200 \times \frac{I_r/N}{I_d + I_r/N} \quad \#(3)$$

$$n = 4 \times \frac{I_d}{I_d + I_r/N} \quad \#(4)$$

where  $I_d$  is the disk current,  $I_r$  is the ring current, and  $N=0.37$  is the current collection efficiency of the Pt ring.

### 3. Zn-air battery test

A homemade Zn-air battery was assembled with a Zn/Mg-N-C catalyst-coated carbon paper as the air cathode with a loading density of  $0.52 \text{ mg cm}^{-2}$ , a Zn plate anode and 6 M KOH + 0.1 M  $\text{ZnCl}_2$  aqueous electrolyte. The catalyst ink includes 5 mg of catalyst, 5 mg of  $\text{RuO}_2$ , containing 40  $\mu\text{L}$  of Nafion, 480  $\mu\text{L}$  of DI water and 480  $\mu\text{L}$  ethanol. The ZABs equipped with Pt/C was also fabricated and measured under the same conditions for comparison for comparison.

### 4. Theoretical calculation

The first principle calculations are performed by Vienna Ab initio Simulation Package(VASP)<sup>1</sup> with the projector augmented wave (PAW) method<sup>2</sup>. The exchange-functional is treated using the Perdew-Burke-Ernzerhof (PBE)<sup>3</sup> functional, in combination with the DFT-D3 correction<sup>4</sup>. The cut-off energy of the plane-wave basis is set at 450 eV. For the optimization of both geometry and lattice size, the Brillouin zone integration is performed with  $2 \times 2 \times 1$  Monkhorst-Pack<sup>5</sup> kpoint sampling. The self-consistent calculations apply a convergence energy threshold of 10<sup>-5</sup> eV. The equilibrium geometries and lattice constants are optimized with maximum stress on each atom within 0.02 eV/Å.

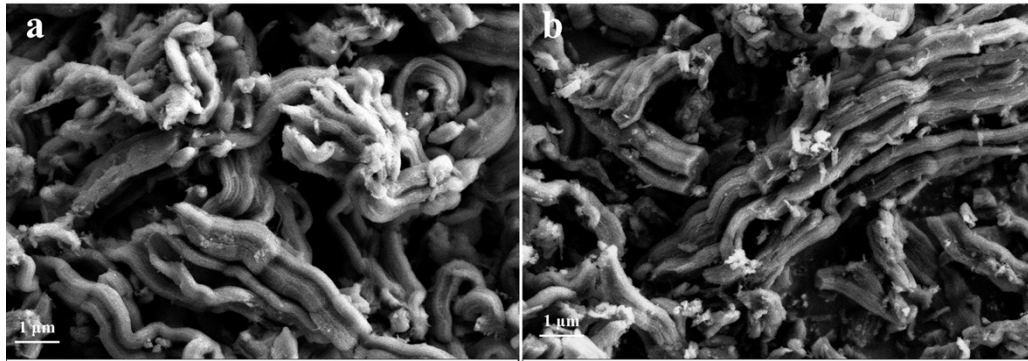

Fig. S1. SEM images of (a) Zn-N-C and (b) Mg-N-C.

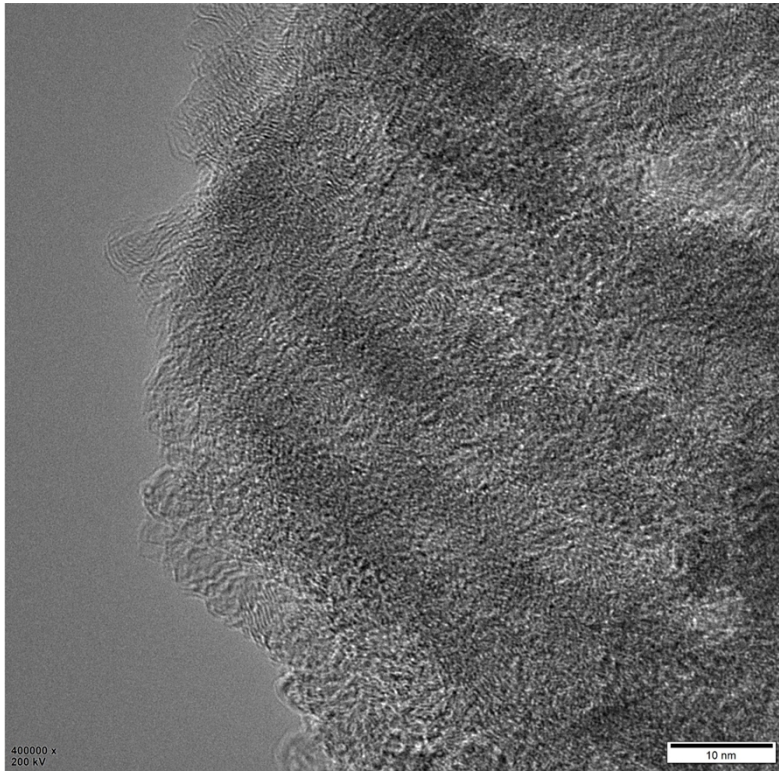

Fig. S2. HRTEM of Zn/Mg-N-C.

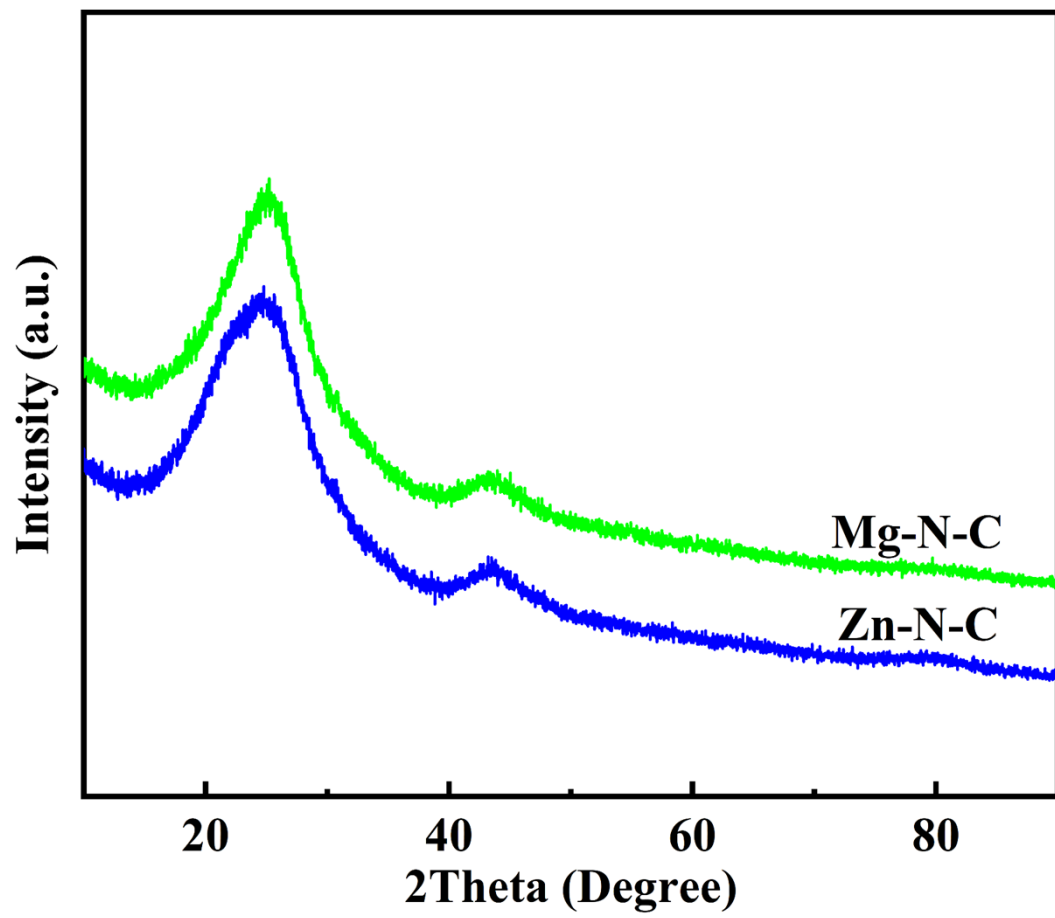

Fig. S3. XRD pattern of Mg-N-C and Zn-N-C.

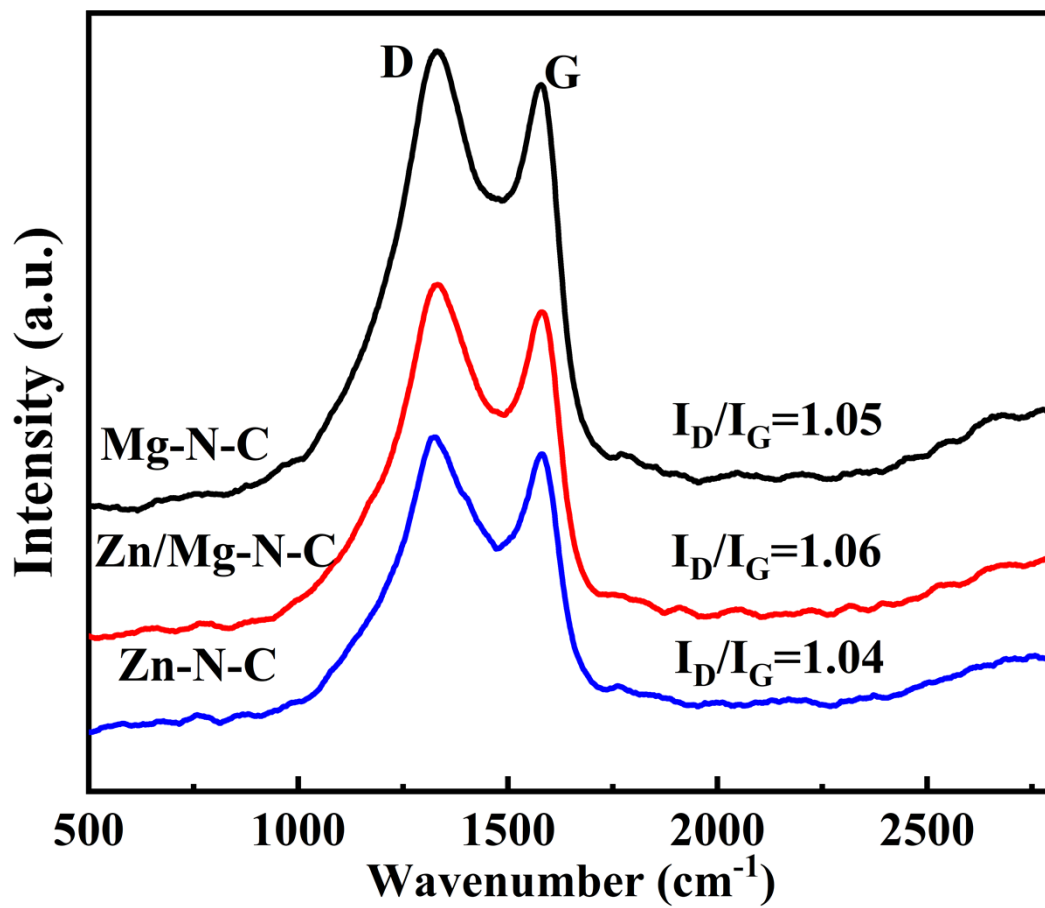

Fig. S4. Raman spectra of Zn/Mg-N-C, Zn-N-C and Mg-N-C.

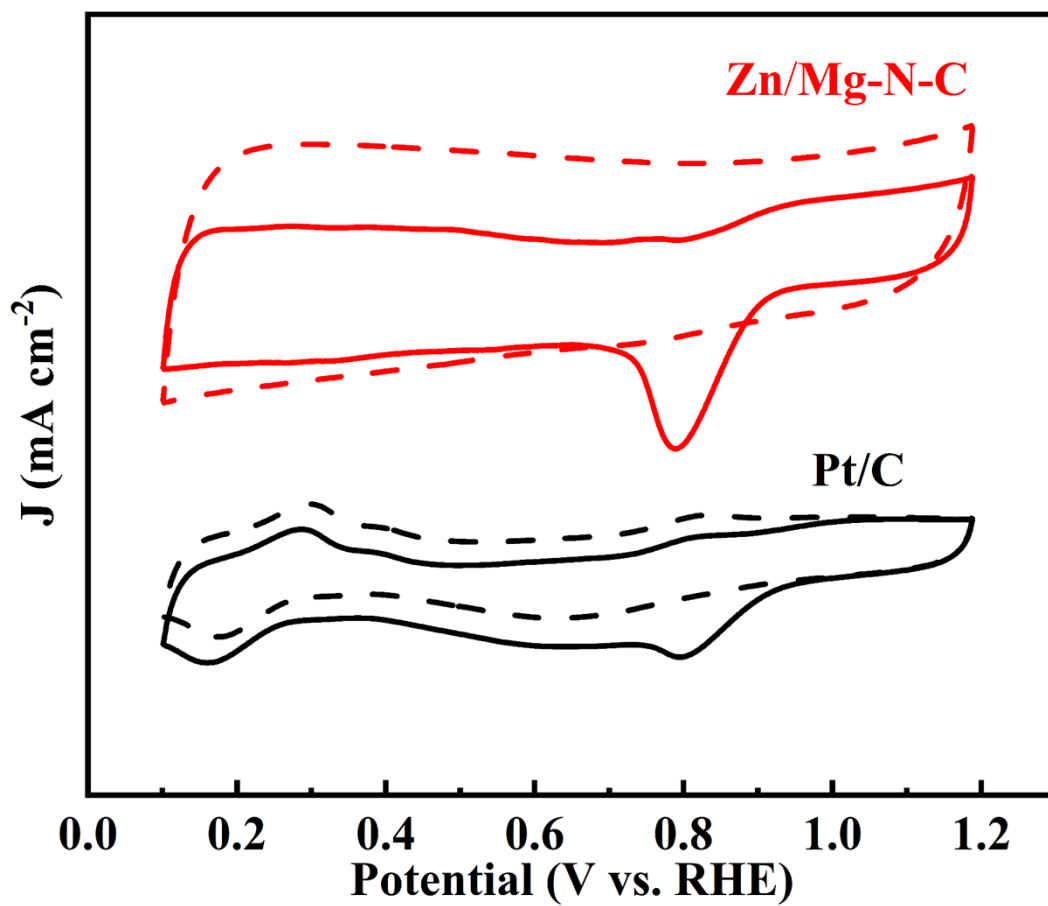

Fig. S5. CV curves for Zn/Mg-N-C, and Pt/C in N<sub>2</sub>/O<sub>2</sub>-saturated solution at a scan rate of 50 mV s<sup>-1</sup>.

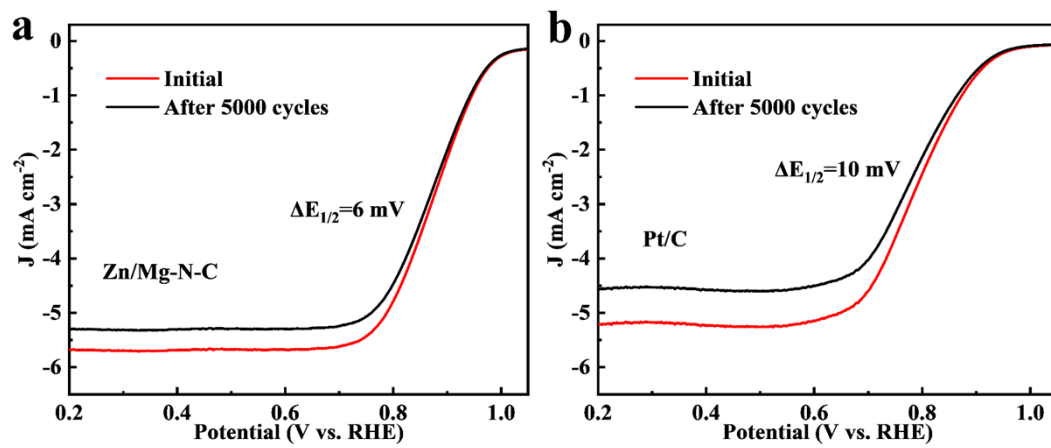

Fig. S6. RDE curves recorded in 0.1 M KOH before and after 5,000 cycles for Zn/Mg-N-C (a) and Pt/C (b).

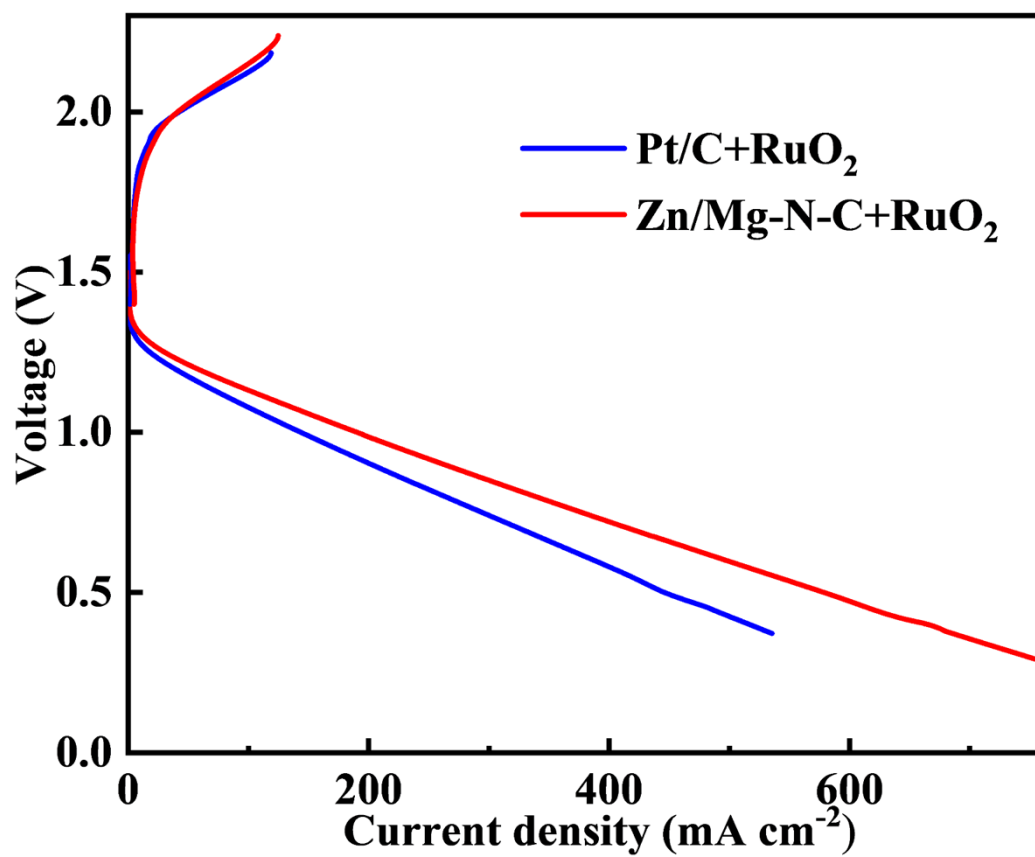

Fig.

S7. Discharge and charge polarization curves of Zn/Mg-N-C+RuO<sub>2</sub>-based ZABs, and Pt/C+RuO<sub>2</sub>-based ZABs for Zn-air battery.



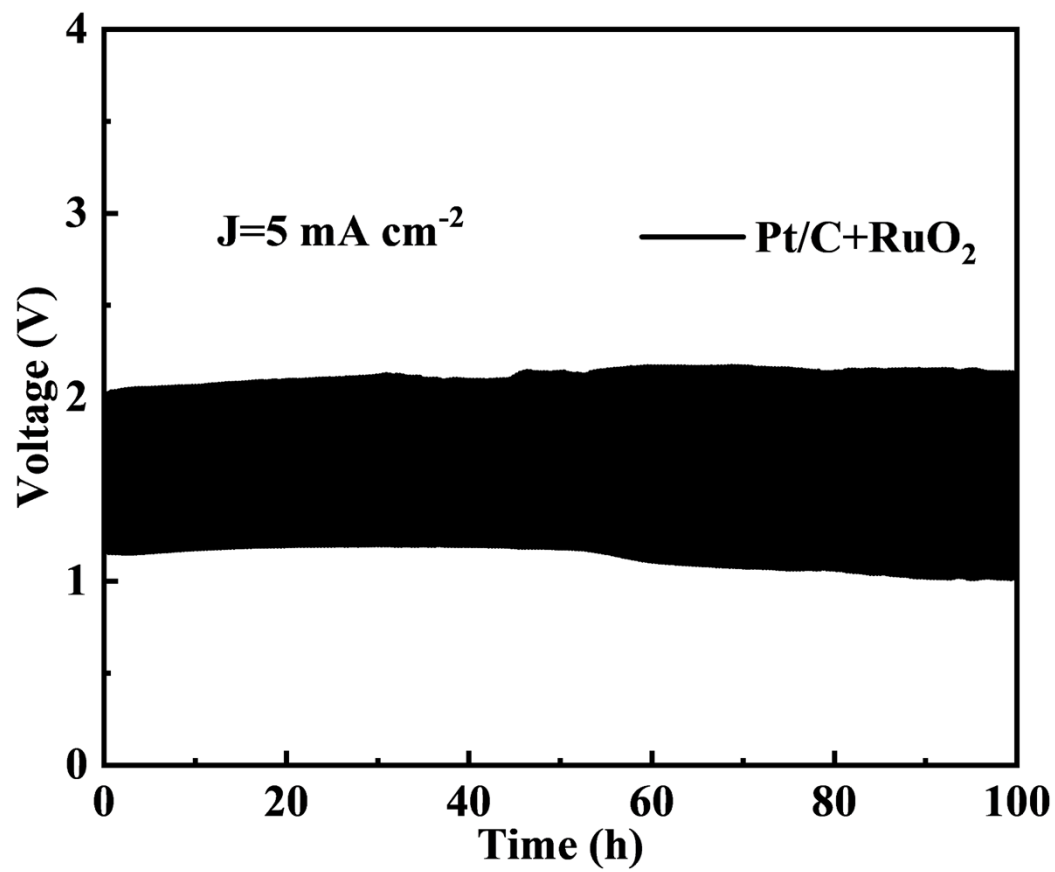

Fig. S8. Cycling tests of batteries for Pt/C+RuO<sub>2</sub>-based ZABs at a current density of 5 mA cm<sup>-2</sup>.

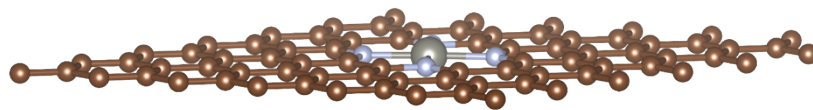

Fig. S9 Optimized geometry of Zn-N-C.

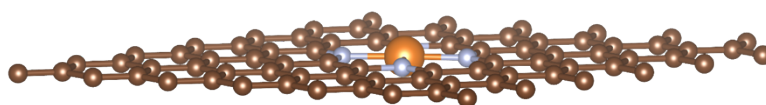

Fig. S10 Optimized geometry of Mg-N-C.

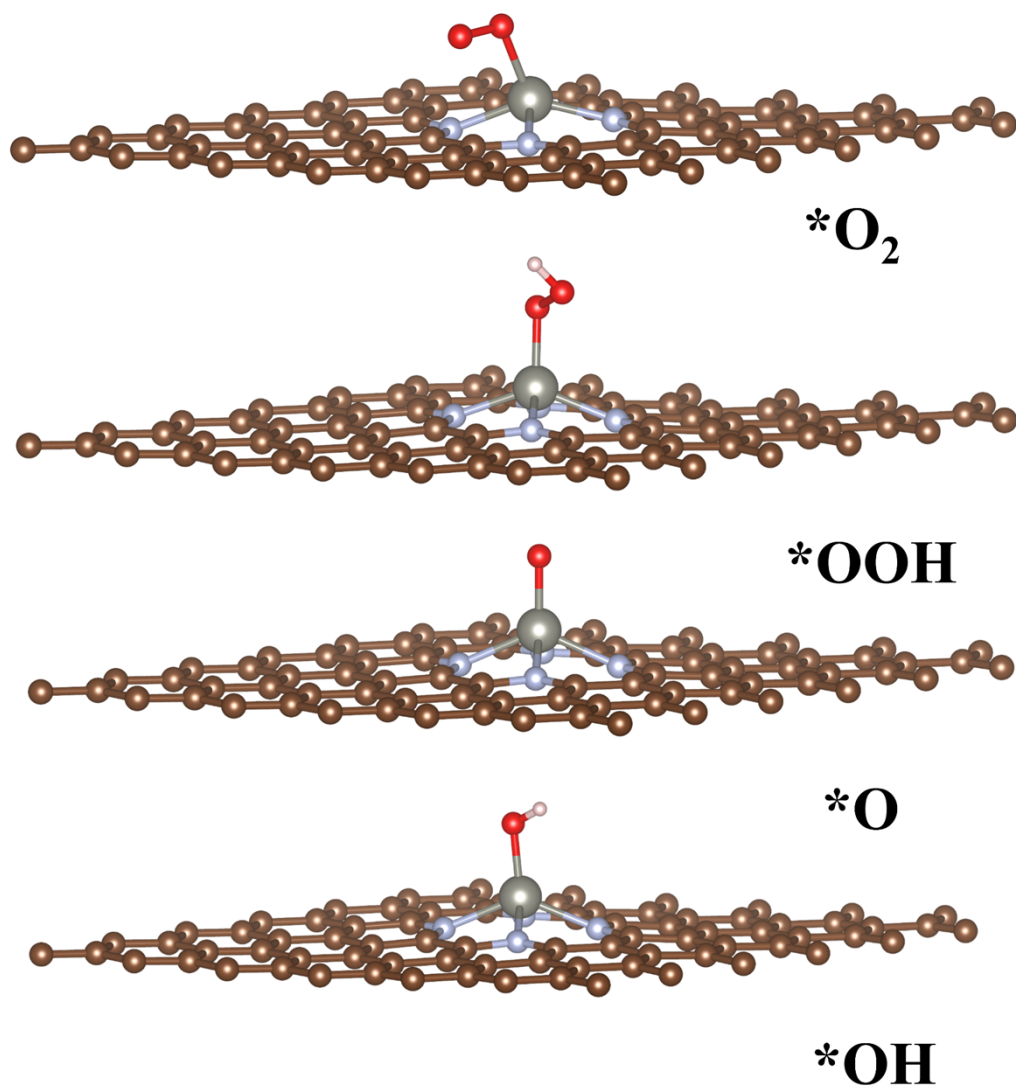

Fig. S11 The models of  $*O_2$ ,  $*OOH$ ,  $*O$ ,  $*OH$  intermediate adsorbed on the active site of Zn -N-C.

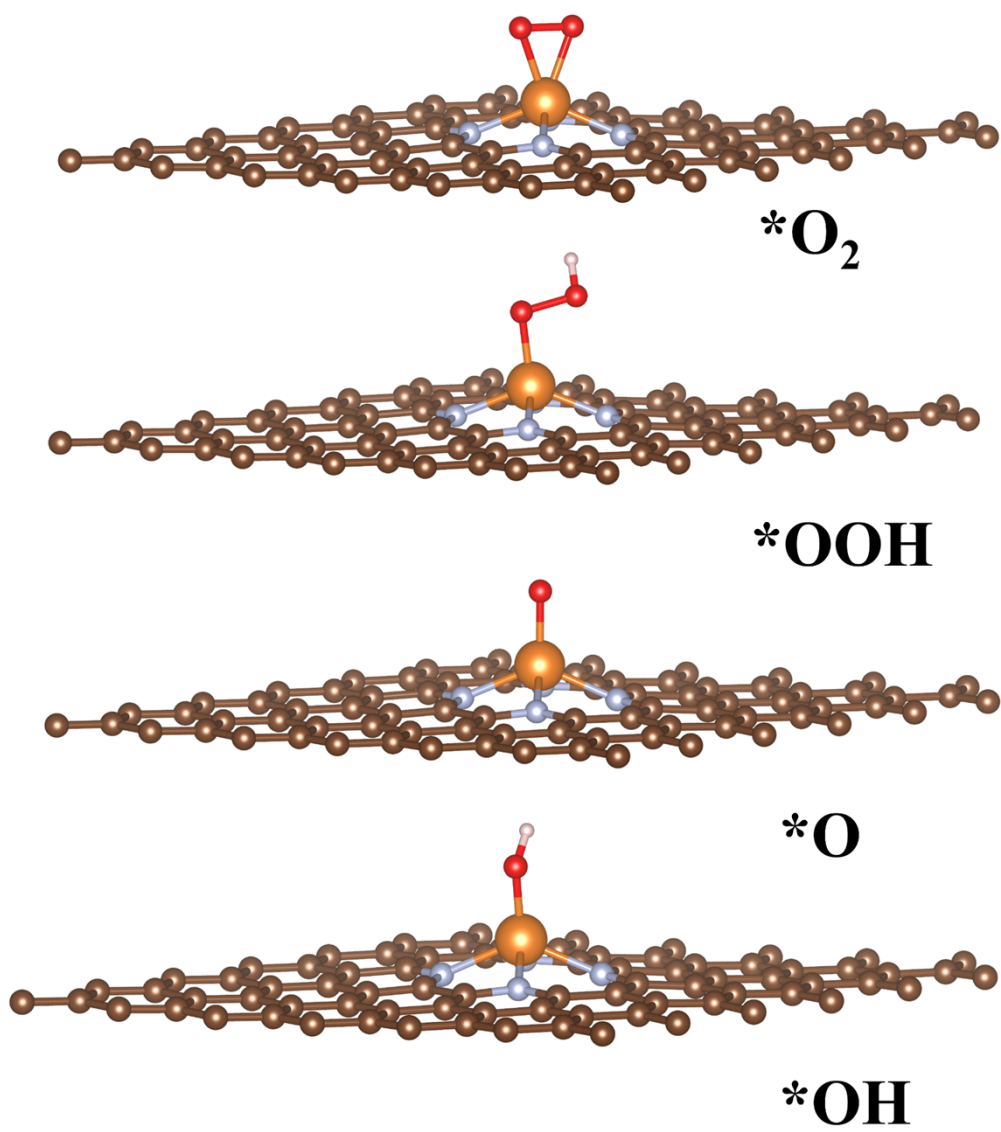

Fig. S12 The models of \*O<sub>2</sub>, \*OOH, \*O, \*OH intermediate adsorbed on the active site of Mg-N-C.

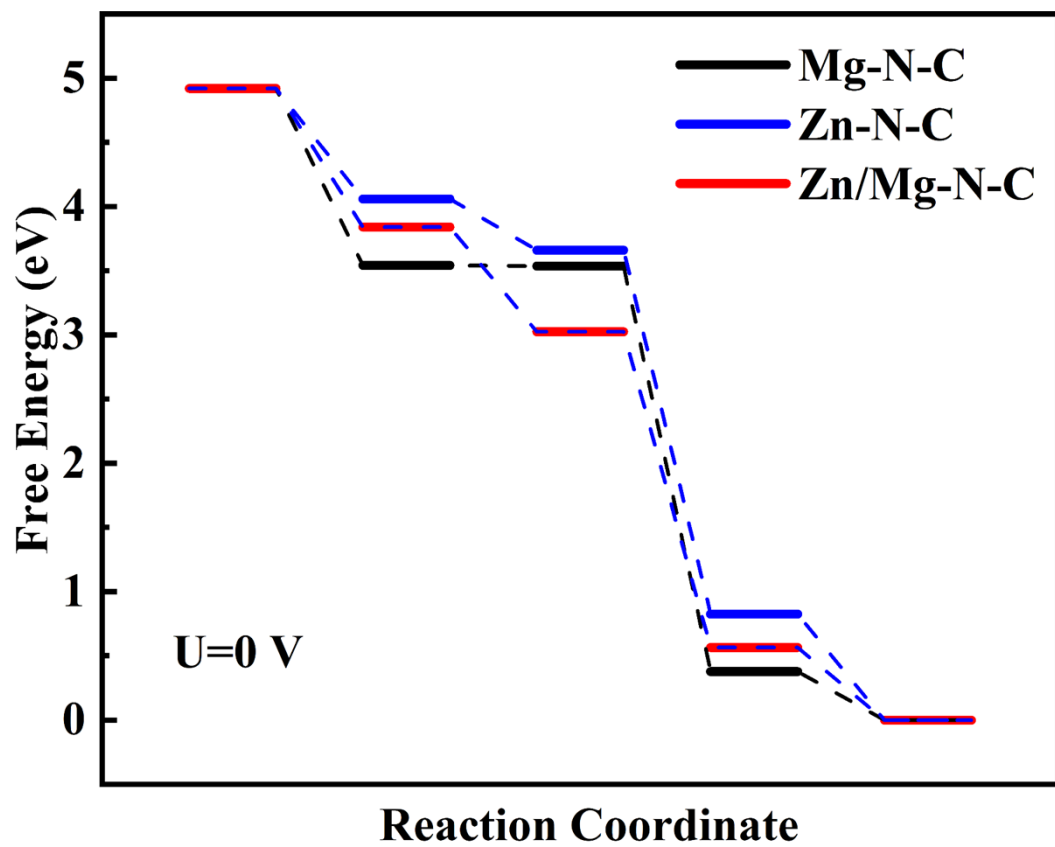

Fig. S13 The Gibbs free energy diagram of the ORR on Zn/Mg-N-C, Zn-N-C and Mg-N-C obtained from DFT calculations ( $U=0$  V).

Table S1. The Content of Zn and Mg in Zn/Mg-N-C

| Catalyst  | Zn content (wt%) | Mg content (wt%) |
|-----------|------------------|------------------|
| Zn/Mg-N-C | 0.57             | 0.21             |

Table S2. Comparison of electrocatalytic ORR activity as well as ZABs performance of recently reported metal doped carbon-based electrocatalysts

| Sample                                 | Half-wave potential<br>(V vs. RHE) | Power density<br>(mW cm <sup>-2</sup> ) | Ref.                                         |
|----------------------------------------|------------------------------------|-----------------------------------------|----------------------------------------------|
| Zn/Mg-N-C                              | 0.89                               | 298.7                                   | This work                                    |
| Fe/Co NPs                              | 0.82                               | 124.9                                   | Nano-Micro Lett., 2023,<br>15, 26.           |
| ZnCo <sub>2</sub> @NCNTs-800           | 0.85                               | 194.3                                   | Chem. Eng. J., 2022,<br>429, 132199.         |
| Mg-N-C@800                             | 0.80                               | N.A.                                    | Appl. Mater. Today,<br>2020, 21, 100846.     |
| P-Fe-N-CNTs                            | 0.88                               | 145                                     | Appl. Catal., B, 2023,<br>327, 122469.       |
| NC-Co <sub>3</sub> O <sub>4</sub> /CC  | 0.87                               | 82                                      | Adv. Mater., 2017, 29,<br>1704117.           |
| Zn-N-C                                 | 0.873                              | N.A.                                    | Angew. Chem. 2019, 58,<br>7035-7039          |
| Fe/SNCFs-NH                            | 0.89                               | 255.84                                  | Adv. Mater., 2022, 34,<br>2105410.           |
| SSM/Co <sub>4</sub> N/CoNC             | 0.83                               | 105                                     | Small, 2022, 18,<br>2105887.                 |
| Fe-NSDC                                | 0.84                               | 225.1                                   | Small, 2019, 15,<br>1900307.                 |
| Cu/Zn-NC                               | 0.83                               | N.A.                                    | Angew. Chem., 2021, 60,<br>14005-14012.      |
| Fe-Co DSAC                             | 0.86                               | 152.8                                   | Energy Storage Mater.,<br>2022, 45, 805–813. |
| Co/CNT_10 Mg/Ni                        | 0.75                               | 181                                     | J. Mater. Chem. A,<br>2021, 9, 25160–25167.  |
| ZnCo-HNC                               | 0.82                               | 123.7                                   | Small 2022, 18, 2107141                      |
| SA Fe@ZrO <sub>2</sub> /NC             | 0.86                               | 250                                     | Chem. Eng. J., 2021, 420,<br>129938          |
| ZnCo <sub>2</sub> Se <sub>4</sub> @rGO | 0.802                              | 137.1                                   | Small 2023, 19, 2207096                      |
| Mo <sub>2</sub> C/MoC/Co@CNTs          | 0.82                               | 134                                     | J. Power Sources, 2024,<br>595, 234063       |
| FeSA-N-C                               | 0.89                               | N.A.                                    | Angew. Chem., 2018, 57,<br>8525-8529.        |
| ZnSe@PNC                               | 0.905                              | 126                                     | Chem Eng J, 2024, 481,<br>148598.            |
| Fe/Zn-N-C                              | 0.906                              | N.A.                                    | Energ Environ Sci, 2022,<br>15, 1601-1610.   |

## Reference

1. J. P. Perdew, K. Burke, M. Ernzerhof, Phys. Rev. Lett. 1996, 77, 3865.
2. G. Kresse, D. Joubert, Phys. Rev. B 1999, 59, 1758.
3. J.P. Perdew, K. Burke, M. Ernzerhof, Phys. Rev. Lett. 77 (1996) 3865.
4. S. Grimme, J. Antony, S. Ehrlich, and S. Krieg, J. Chem. Phys. 132, 154104 (2010).
5. H. J. Monkhorst, J. D. Pack, Phys. Rev. B 1976, 13, 5188.
6. Z. Zhang, J. Sun, F. Wang and L. Dai, Angewandte Chemie International Edition, 2018, 57, 9038-9043.
